# Supplementary material
Source: PubMed Central journal article supplement (PMC5195915)
Supplement: NIHMS812444-supplement-Supp_Fig_Table.pdf [file NIHMS812444-supplement-Supp_Fig_Table.pdf]

**Supplementary Figure 1. The MSL1 precursor is not imported into isolated chloroplasts *in vitro*.** Radiolabelled MSL1 precursor was incubated with purified chloroplasts under conditions that support protein uptake (first panel). Following import, thermolysin treatment was conducted as indicated. The uptake of small subunit of RUBISCO (SSU) was used as a positive control for chloroplast import (second panel). p, precursor protein; m, processed mature protein.

**Supplementary Figure 2. Characterization of *msl1-1*-knockout and complemented lines of *Arabidopsis*.** (A) Schematic showing location of the T-DNA insertion in the *MSL1* gene. (B) Semi-quantitative RT-PCR showing loss of transcript in *msl1-1* and its restoration in the complemented line. (C) The loss and restoration of MSL1 protein in the mutant (*msl1-1*) and complemented line (*msl1-1/gMSL1*) is demonstrated by western blot of peripheral and membrane fractions of mitochondria using antibody against MSL1 (also refer to Figure 1C for a more detailed figure legend). (D) Phenotype of *msl1-1*-knockout and complemented lines grown on agar plates and soil.

**Supplementary Figure 3. Verification of MSL1 expression in *E. coli*.** (A) SDS-PAGE of Triton X-100-soluble (lane A, total cytoplasmic and membrane fraction) and –insoluble (lane B, fraction of inclusion bodies) proteins following overexpression of MSL1 in *E. coli*. Proteins were either visualized directly by Coomassie blue staining (left) or transferred onto a PVDF membrane for immunoblotting with an antibody against penta-histidine tag (right). The location of MSL1 band on the gel is indicated by a black triangle. (B) 1D Blue Native/SDS-PAGE of Triton X-100-solubilized fraction from *E. coli* expressing either RAC-kinase (lane 1, control) or mature MSL1 (lane 2). Proteins were either visualized directly by Coomassie blue staining (left) or transferred onto a PVDF membrane for immunoblotting with a peptide antibody raised against MSL1 (right). The location of MSL1 band on the Coomassie-stained gel is indicated by a black triangle.

**Supplementary Figure 4. Comparison of tension-gated MSL1 channel activity under positive and negative membrane potentials.**

**Supplementary Data 1. Identification of MSL1 by Mass spectrometry.** Excel file includes a list of peptides detected in this study and in published literature. Three MGF files contain the identity of all peptides/proteins in the MSL1-containing protein spot extracted from three independent fractionation of isolated mitochondria on Blue-Native/SDS-PAGE.

**Supplementary Table 1. A list of primers used in this study.**

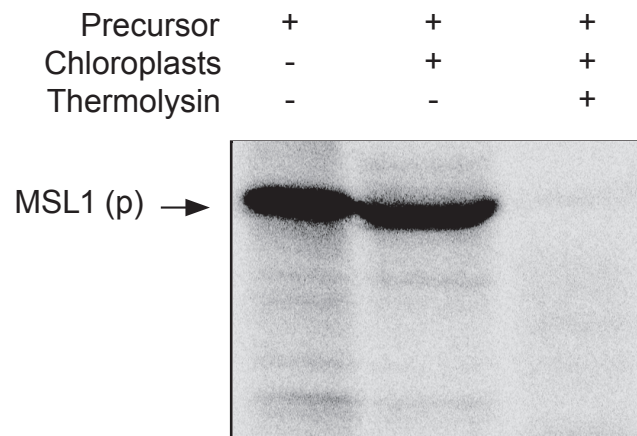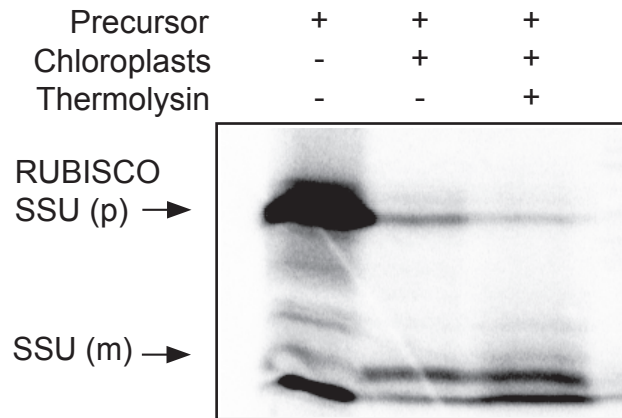

**Supplementary Figure 1. The MSL1 precursor protein is not imported into isolated chloroplasts *in vitro***

**A**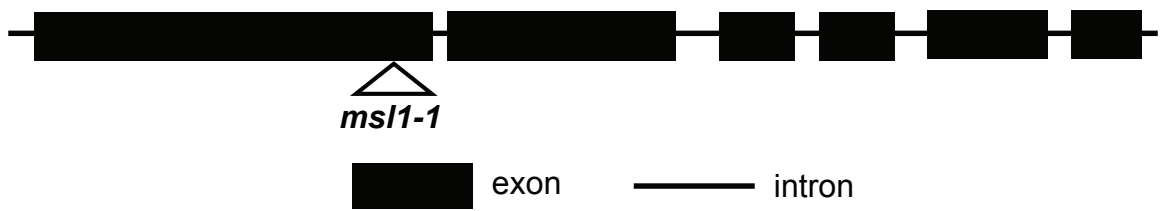**B**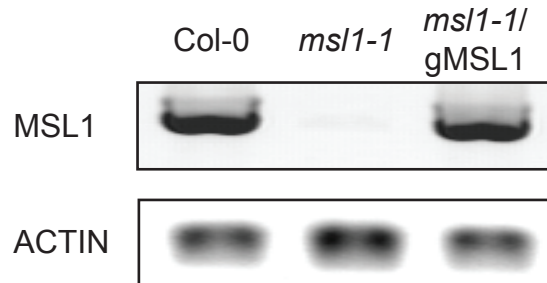**C**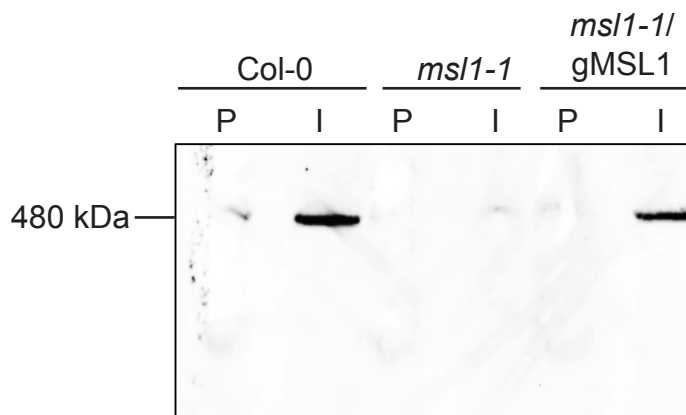**D**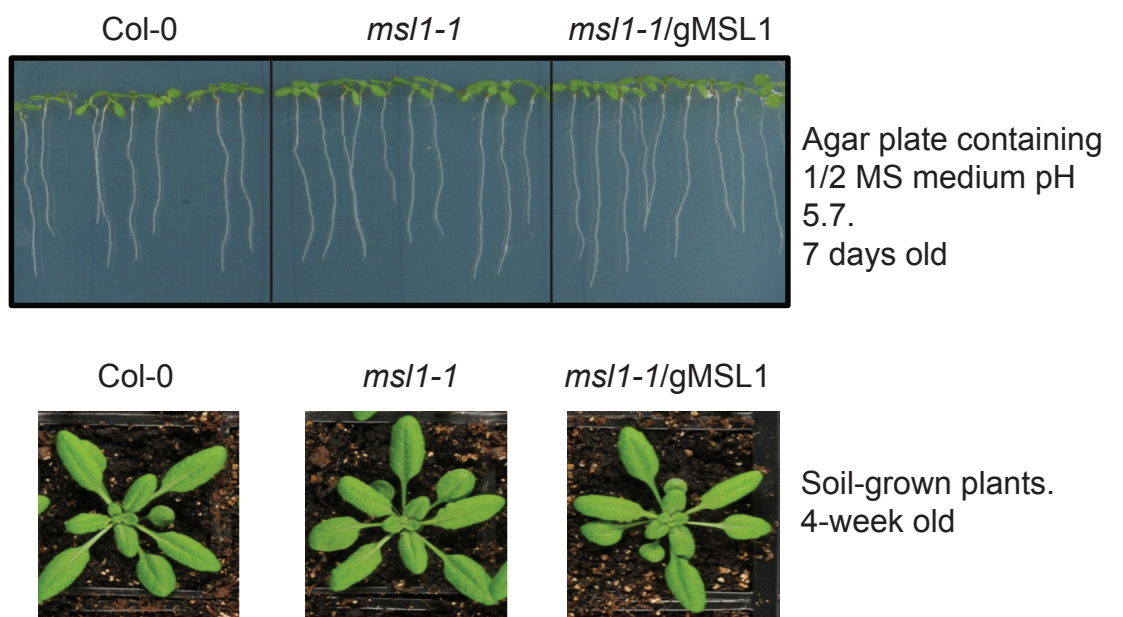

**Supplementary Figure 2. Characterization of *msl1*-knockout and complemented lines of Arabidopsis**

**A**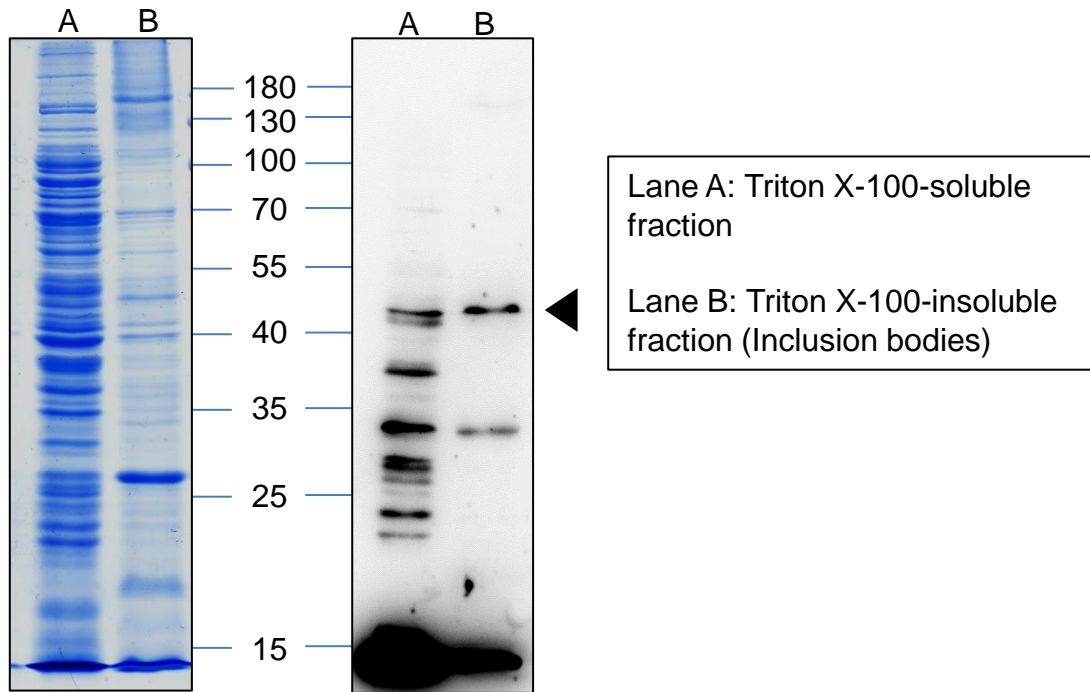**B**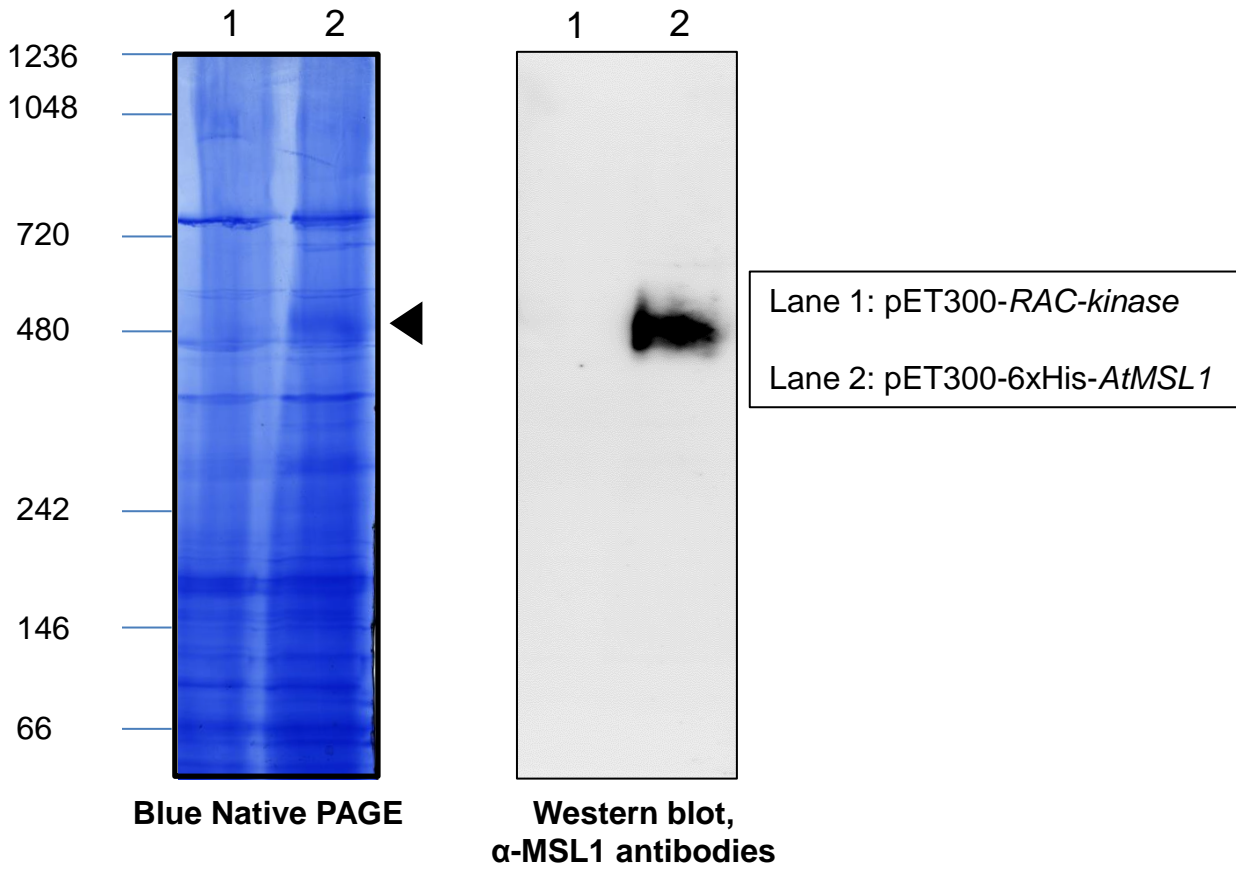

Supplementary Figure 3. Verification of MSL1 expression in *E. coli*.

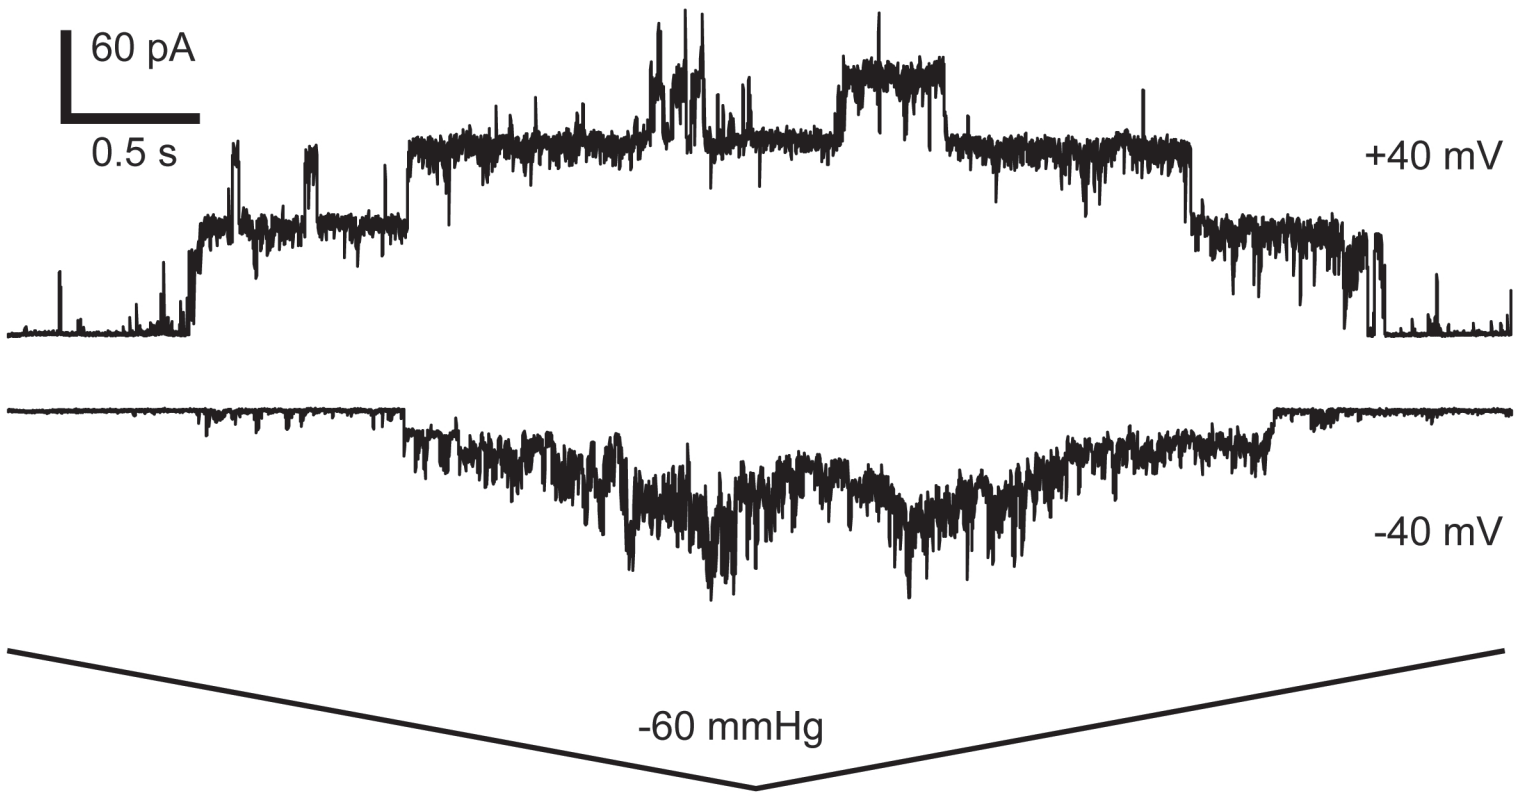

**Supplementary Figure 4. Comparison of tension-gated MSL1 channel activity under positive and negative membrane potentials.**

| Pimer name   | Primer sequence                                            | Purpose                                                                                                |
|--------------|------------------------------------------------------------|--------------------------------------------------------------------------------------------------------|
| MSL1_F       | ATGGCCGGAGTTAGGTTATCGC                                     | Genotyping of MSL1 transgenic lines with genomic DNA                                                   |
| MSL1_R       | CTTCTCCCTATCAAGCCCACC                                      | Genotyping of MSL1 transgenic lines with genomic DNA                                                   |
| T-DNA_F      | ATATTGACCATCATACTCATTGC                                    | Genotyping of MSL1 transgenic lines with genomic DNA                                                   |
| T-DNA_R      | ATAGCGAAAAGACCAACAGATGAT                                   | Genotyping of MSL1 transgenic lines with genomic DNA                                                   |
| MSL1_sqPCR_F | ATGGCCGGAGTTAGGTTATCGC                                     | Semi-quantitative PCR of MSL1                                                                          |
| MSL1_sqPCR_R | TCACAATGTAGAATTGCCAGGTG                                    | Semi-quantitative PCR of MSL1                                                                          |
| MSL1_qPCR_F  | TGGAGGGTAGCCACCGCATTTG                                     | Quantitative PCR of MSL1                                                                               |
| MSL1_qPCR_R  | CCTTCTACGGATCCAGCTTTGATAG                                  | Quantitative PCR of MSL1                                                                               |
| LHO710       | CACC GCT CTG ATT GAC ATA GAA GAA G                         | For generating genomic complementation transgene MSL1g                                                 |
| LHO817       | CCT GTA CAT AGG AAT TGT TAG AAC CCT ATA AAT ACC TAC        | For generating genomic complementation transgene MSL1g                                                 |
| MSL1-GFP_F   | CACCATGGCCGGAGTTAGGTTATCG                                  | For generating MSL1-GFP construct                                                                      |
| MSL1-GFP_R   | GGAGACCAGAACACGATTTTGC                                     | For generating MSL1-GFP construct                                                                      |
| His-MSL1-m_F | CACCAGCTCAAATCTGATGATTC                                    | Generation of MSL1-carrying vector for bacterial expression and protein extraction                     |
| His-MSL1-m_R | TCACAATGTAGAATTGCCAGGTG                                    | Generation of MSL1-carrying vector for bacterial expression and protein extraction                     |
| LHO2458      | AGC TTC TCG AGA ATT ATG CAT CAT CAT CAT CAC ATC ACA AG     | Generation of MSL1-carrying vector for bacterial expression, osmotic shock assay and electrophysiology |
| LHO2459      | CGT CCT TGT AGT CGA TCA CAA TGT AGA ATT GTC CCA GGT GG     | Generation of MSL1-carrying vector for bacterial expression, osmotic shock assay and electrophysiology |
| LHO2460      | AGC TTC TCG AGA ATT ATG AGC TCC AAA TCT GAT GAT TTC GGA AG | Generation of MSL1-carrying vector for bacterial expression, osmotic shock assay and electrophysiology |
| LHO2462      | CGT CCT TGT AGT CGA ATG TAG AAT TGT CCC AGG TGG TAC C      | Generation of MSL1-carrying vector for bacterial expression, osmotic shock assay and electrophysiology |
